# Supplementary material
Source: publisher site journal article supplement (https://www.dovepress.com/article/341271)
Supplement: Supplementary file 1 [file get_supplementary_file.php]

**Supplementary** **Table 1** Summary of Treatment emergent adverse events (TEAEs) by Systemic organ class and Preferred Term

| **System Organ Class** Preferred Term | 20 mg dose group | | | 40 mg dose group | | |
| --- | --- | --- | --- | --- | --- | --- |
| AD-206  20/600 mg (N=44) | Nexium  20 mg (N=44) | Total (N=44) | AD-206  40/600 mg (N=37) | Nexium  40 mg (N=39) | Total (N=39) |
| **Subjects with TEAEs** | 5 (11.4) [13] | 9 (20.5) [16] | 13 (29.5) [29] | 7 (18.9) [11] | 3 (7.7) [6] | 8 (20.5) [17] |
| **Cardiac disorders** | 1 (2.3) [1] | . | 1 (2.3) [1] | . | . | . |
| Palpitations | 1 (2.3) [1] | . | 1 (2.3) [1] | . | . | . |
| **Gastrointestinal disorders** | 3 (6.8) [5] | 2 (4.5) [2] | 5 (11.4) [7] | 2 (5.4) [4] | 1 (2.6) [2] | 2 (5.1) [6] |
| Abdominal discomfort | . | 1 (2.3) [1] | 1 (2.3) [1] | 1 (2.7) [1] | 1 (2.6) [1] | 1 (2.6) [2] |
| Abdominal pain lower | 1 (2.3) [1] | . | 1 (2.3) [1] | . | . | . |
| Abdominal pain upper | 1 (2.3) [1] | . | 1 (2.3) [1] | . | . | . |
| Diarrhoea | 1 (2.3) [1] | . | 1 (2.3) [1] | 2 (5.4) [2] | . | 2 (5.1) [2] |
| Feces discoloured | . | . | . | . | 1 (2.6) [1] | 1 (2.6) [1] |
| Haematochezia | . | 1 (2.3) [1] | 1 (2.3) [1] | 1 (2.7) [1] | . | 1 (2.6) [1] |
| Nausea | 1 (2.3) [2] | . | 1 (2.3) [2] | . | . | . |
| **General disorders and administration site conditions** | 1 (2.3) [1] | 3 (6.8) [4] | 4 (9.1) [5] | 1 (2.7) [1] | 1 (2.6) [2] | 1 (2.6) [3] |
| Asthenia | . | . | . | . | 1 (2.6) [1] | 1 (2.6) [1] |
| Chest discomfort | . | 1 (2.3) [1] | 1 (2.3) [1] | . | . | . |
| Chills | . | 1 (2.3) [1] | 1 (2.3) [1] | . | . | . |
| Fatigue | . | 1 (2.3) [1] | 1 (2.3) [1] | . | . | . |
| Feeling hot | 1 (2.3) [1] | . | 1 (2.3) [1] | . | . | . |
| Pyrexia | . | . | . | 1 (2.7) [1] | 1 (2.6) [1] | 1 (2.6) [2] |
| Sensation of foreign body | . | 1 (2.3) [1] | 1 (2.3) [1] | . | . | . |
| **Injury, poisoning and procedural complications** | . | 2 (4.5) [2] | 2 (4.5) [2] | 1 (2.7) [1] | . | 1 (2.6) [1] |
| Eyelid abrasion |  |  |  | 1 (2.7) [1] | . | 1 (2.6) [1] |
| Skin abrasion | . | 2 (4.5) [2] | 2 (4.5) [2] | . | . | . |
| **Musculoskeletal and connective tissue disorder** | . | . | . | 2 (5.4) [2] | . | 2 (5.1) [2] |
| Back pain | . | . | . | 1 (2.7) [1] | . | 1 (2.6) [1] |
| Musculoskeletal chest pain | . | . | . | 1 (2.7) [1] | . | 1 (2.6) [1] |
| **Nervous system disorders** | 2 (4.5) [2] | 3 (6.8) [3] | 5 (11.4) [5] | 3 (8.1) [3] | . | 3 (7.7) [3] |
| Dizziness | . | 1 (2.3) [1] | 1 (2.3) [1] | 1 (2.7) [1] | . | 1 (2.6) [1] |
| Headache | 2 (4.5) [2] | 2 (4.5) [2] | 4 (9.1) [4] | 2 (5.4) [2] | . | 2 (5.1) [2] |
| **Respiratory, thoracic and mediastinal disorders** | 3 (6.8) [4] | 3 (6.8) [5] | 6 (13.6) [9] | . | 1 (2.6) [2] | 1 (2.6) [2] |
| Epistaxis | . | 1 (2.3) [1] | 1 (2.3) [1] | . | . | . |
| Oropharyngeal pain | 2 (4.5) [2] | 1 (2.3) [1] | 3 (6.8) [3] | . | . | . |
| Productive cough | . | 1 (2.3) [1] | 1 (2.3) [1] | . | . | . |
| Rhinorrhoea | 2 (4.5) [2] | 2 (4.5) [2] | 4 (9.1) [4] | . | 1 (2.6) [1] | 1 (2.6) [1] |
| Sneezing | . | . | . | . | 1 (2.6) [1] | 1 (2.6) [1] |

**Notes:** Data are displayed as number of subjects (percentage of subjects) [number of events].
